# Supplementary material
Source: PubMed Central journal article supplement (PMC4891292)

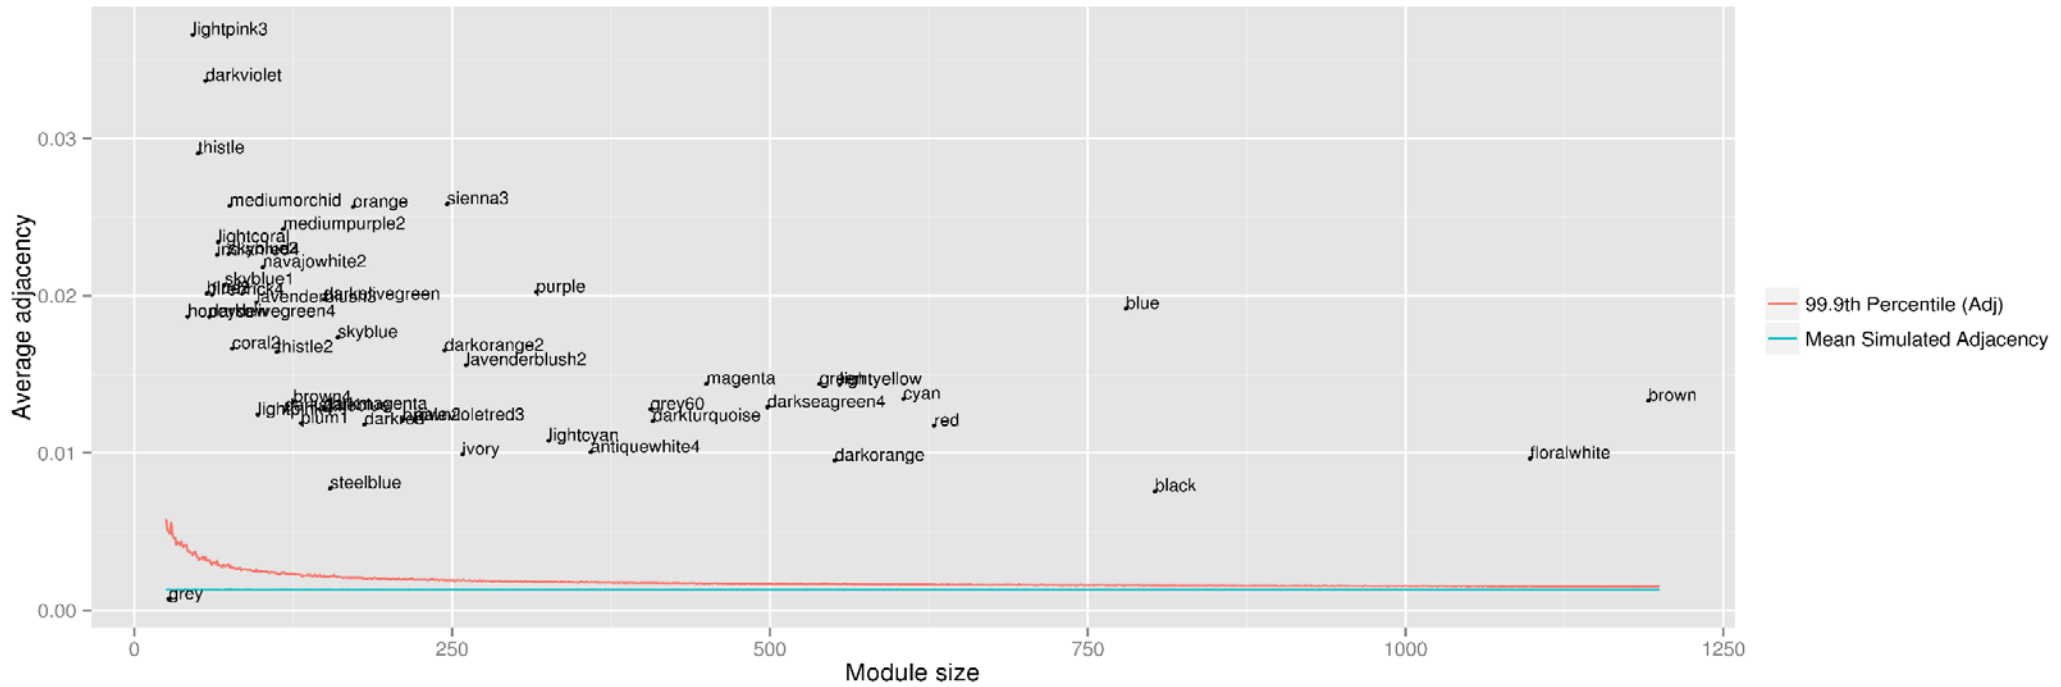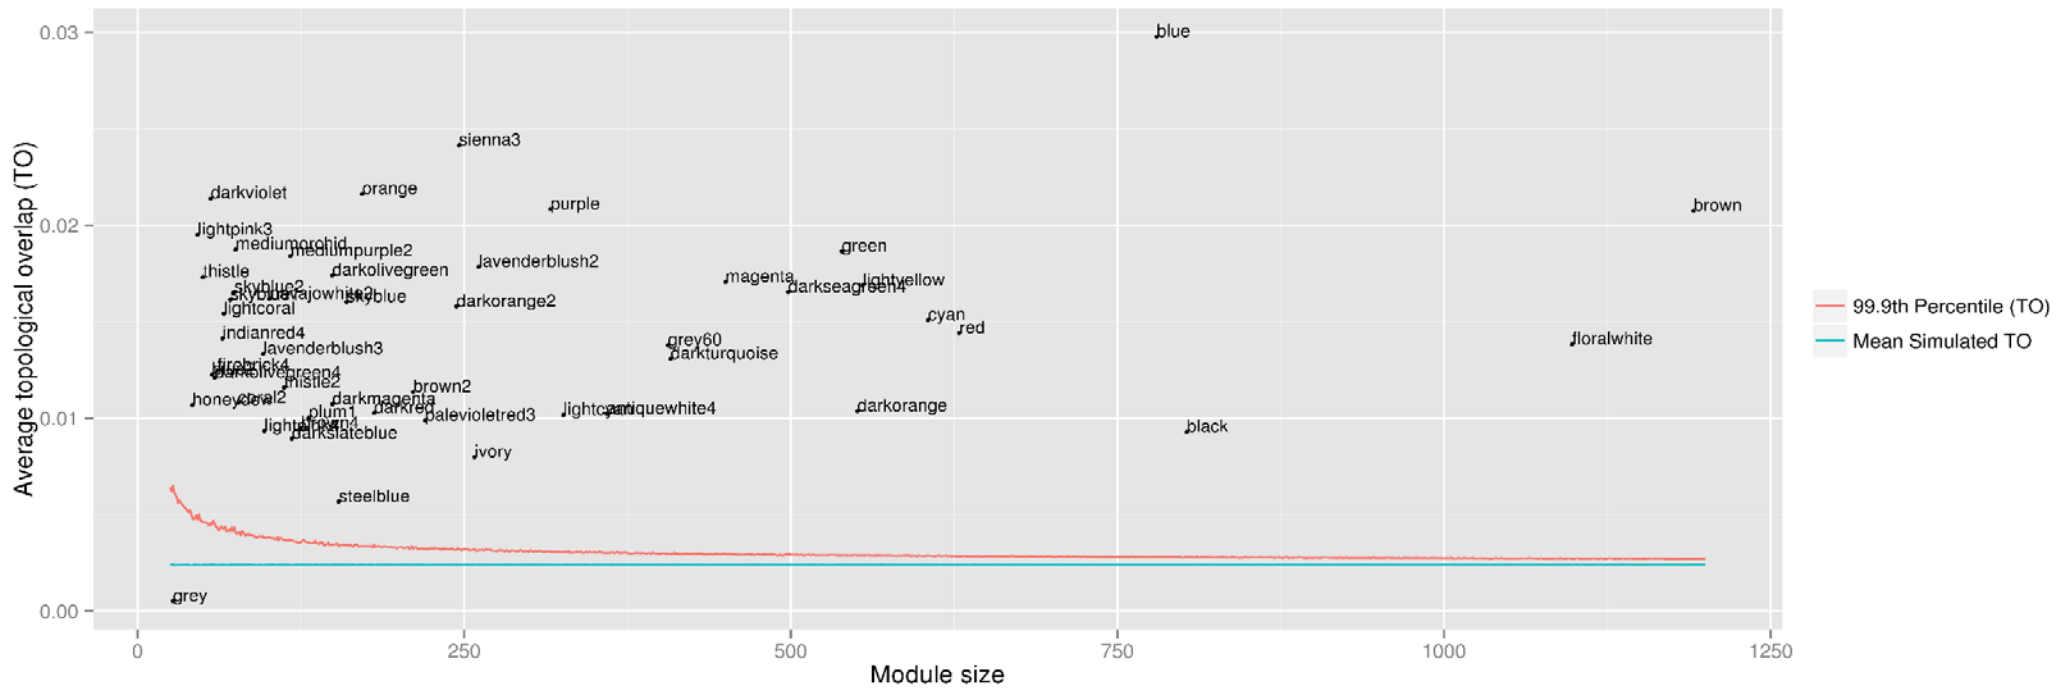

Supplement: NIHMS781923-supplement-Module_Robustness.pdf [file NIHMS781923-supplement-Module_Robustness.pdf]
